# Supplementary material
Source: PubMed Central journal article supplement (PMC6560342)

## SUPPLEMENTAL DATA

Table S1. Characteristics of retrieved articles

| First Author               | Year | Diagnosis | N    | Risk groups | Type of event | Time of event | WBC time       | Cut-off                   | RR   | 95% Low CI | 95% Up CI | Model         |
|----------------------------|------|-----------|------|-------------|---------------|---------------|----------------|---------------------------|------|------------|-----------|---------------|
| <b>OUTCOME: THROMBOSIS</b> |      |           |      |             |               |               |                |                           |      |            |           |               |
| Abdulkarim                 | 2017 | ET        | 1284 | All         | All           | First event   | Diagnosis      | $\geq 12.0 \times 10^9/L$ | 1,67 | 1,18       | 2,35      | Multivariable |
|                            |      | PV        | 1105 | All         | All           | First event   | Diagnosis      | $\geq 12.0 \times 10^9/L$ | 1,16 | 0,88       | 1,51      | Multivariable |
| Alvarez-Larran             | 2010 | ET        | 300  | Low-risk    | All           | First event   | Diagnosis      | $\geq 8.7 \times 10^9/L$  | 0,8  | 0,4        | 1,8       | Multivariable |
| Alvarez-Larran             | 2012 | PV        | 261  | All         | All           | First event   | Diagnosis      | $\geq 10.0 \times 10^9/L$ | 1,36 | 0,61       | 2,75      | Multivariable |
| Andriani                   | 2016 | ET        | 1297 | All         | All           | First event   | Diagnosis      | $\geq 8.7 \times 10^9/L$  | 1,52 | 1,03       | 2,22      | Multivariable |
| Bai                        | 2008 | PV        | 320  | All         | All           | First event   | Diagnosis      | Continuous                | 1    | 0,98       | 1,03      | Univariate    |
| Barbui                     | 2015 | PV        | 365  | All         | All           | First event   | Time-dependent | $\geq 11.0 \times 10^9/L$ | 3,9  | 1,24       | 12,3      | Multivariable |
| Buxhofer-Ausch             | 2016 | ET        | 620  | All         | All           | First event   | Time-dependent | $\geq 8.48 \times 10^9/L$ | 4,13 | 1,38       | 12,34     | Univariate    |
| Caramazza                  | 2009 | ET        | 88   | All         | All           | First event   | Diagnosis      | $\geq 9.5 \times 10^9/L$  | 1,7  | 0,5        | 3,1       | Multivariable |
|                            |      | PV        | 99   | All         | All           | First event   | Diagnosis      | $\geq 9.5 \times 10^9/L$  | 1,6  | 0,4        | 2,8       | Multivariable |
| Carobbio                   | 2007 | ET        | 439  | All         | All           | First event   | Diagnosis      | $\geq 8.7 \times 10^9/L$  | 2,3  | 1,4        | 3,9       | Multivariable |
|                            |      | ET        | 439  | All         | All           | First event   | Time-dependent | $\geq 8.7 \times 10^9/L$  | 1,6  | 0,9        | 2         | Multivariable |
| Carobbio                   | 2008 | ET        | 657  | All         | All           | First event   | Diagnosis      | $\geq 10.4 \times 10^9/L$ | 3    | 1,3        | 6,9       | Multivariable |
| Carobbio                   | 2008 | ET        | 1063 | All         | All           | First event   | Diagnosis      | $\geq 11.0 \times 10^9/L$ | 2    | 1,1        | 3,6       | Multivariable |
| Carobbio                   | 2009 | PV+ET     | 1282 | All         | All           | First event   | Diagnosis      | $\geq 11.3 \times 10^9/L$ | 1,93 | 1,01       | 2,77      | Multivariable |

| First Author   | Year | Diagnosis | N    | Risk groups | Type of event | Time of event | WBC time   | Cut-off                   | RR   | 95% Low CI | 95% Up CI | Model         |
|----------------|------|-----------|------|-------------|---------------|---------------|------------|---------------------------|------|------------|-----------|---------------|
| Carobbio       | 2011 | ET        | 867  | All         | All           | First event   | Diagnosis  | $\geq 11.0 \times 10^9/L$ | 1,14 | 0,72       | 1,79      | Multivariable |
|                |      | ET        | 867  | All         | Arterious     | First event   | Diagnosis  | $\geq 11.0 \times 10^9/L$ | 1,66 | 1,01       | 2,72      | Multivariable |
| Cerquozzi      | 2017 | PV        | 587  | All         | All           | First event   | Diagnosis  | $\geq 11.0 \times 10^9/L$ | 1,3  | 0,9        | 2         | Multivariable |
|                |      | PV        | 587  | All         | Venous        | First event   | Diagnosis  | $\geq 11.0 \times 10^9/L$ | 2    | 1,1        | 3,8       | Multivariable |
| De Stefano     | 2008 | PV+ET     | 494  | All         | All           | Recurrence    | Diagnosis  | $\geq 12.4 \times 10^9/L$ | 1,6  | 0,79       | 3,23      | Multivariable |
|                |      | PV+ET     | 109  | Low-risk    | All           | Recurrence    | Diagnosis  | $\geq 12.4 \times 10^9/L$ | 3,55 | 1,02       | 12,25     | Multivariable |
| De Stefano     | 2010 | PV+ET     | 253  | All         | All           | Recurrence    | Diagnosis  | $\geq 12.4 \times 10^9/L$ | 1,72 | 1          | 2,95      | Multivariable |
|                |      | PV+ET     | 253  | All         | Arterious     | Recurrence    | Diagnosis  | $\geq 12.4 \times 10^9/L$ | 2,16 | 1,12       | 4,18      | Multivariable |
|                |      | PV+ET     | 253  | All         | Venous        | Recurrence    | Diagnosis  | $\geq 12.4 \times 10^9/L$ | 1,14 | 0,43       | 2,98      | Multivariable |
| De Stefano     | 2016 | PV+ET+MF  | 181  | All         | All           | Recurrence    | Diagnosis  | $\geq 14.0 \times 10^9/L$ | 2,8  | 1,32       | 6,28      | Multivariable |
| Enblom-Larsson | 2017 | PV        | 217  | All         | All           | First event   | Diagnosis  | $\geq 10.0 \times 10^9/L$ | 2,88 | 1,23       | 6,60      | Univariate    |
| Gangat         | 2009 | ET        | 254  | All         | Arterious     | First event   | Diagnosis  | $\geq 9.4 \times 10^9/L$  | 1,3  | 0,7        | 2,3       | Univariate    |
|                |      | ET        | 254  | All         | Venous        | First event   | Diagnosis  | $\geq 9.4 \times 10^9/L$  | 0,9  | 0,3        | 2,6       | Univariate    |
|                |      | PV        | 153  | All         | Arterious     | First event   | Diagnosis  | $\geq 15.0 \times 10^9/L$ | 0,7  | 0,3        | 1,8       | Univariate    |
|                |      | PV        | 153  | All         | Venous        | First event   | Diagnosis  | $\geq 15.0 \times 10^9/L$ | 0,5  | 0,5        | 1,2       | Univariate    |
| Haider         | 2016 | ET        | 585  | All         | All           | First event   | Diagnosis  | Continuous                | 1,02 | 0,99       | 1,06      | Multivariable |
| Kaifie         | 2016 | PV        | 141  | All         | All           | First event   | Diagnosis  | $\geq 25 /nl$             | 1,7  | 0,50       | 5,77      | Univariate    |
|                |      | PV+ET     | 278  | All         | All           | First event   | Diagnosis  | $\geq 25 /nl$             | 1,28 | 0,41       | 3,98      | Univariate    |
| Landolfi       | 2007 | PV        | 1638 | All         | All           | First event   | Enrollment | $\geq 15.0 \times 10^9/L$ | 1,24 | 0,78       | 1,96      | Multivariable |

| First Author             | Year | Diagnosis | N    | Risk groups | Type of event | Time of event | WBC time       | Cut-off                   | RR   | 95% Low CI | 95% Up CI | Model         |
|--------------------------|------|-----------|------|-------------|---------------|---------------|----------------|---------------------------|------|------------|-----------|---------------|
|                          |      | PV        | 1638 | All         | Arterious     | First event   | Enrollment     | $\geq 15.0 \times 10^9/L$ | 1,21 | 0,69       | 2,11      | Multivariable |
|                          |      | PV        | 1638 | All         | Venous        | First event   | Enrollment     | $\geq 15.0 \times 10^9/L$ | 1,28 | 0,56       | 2,92      | Multivariable |
|                          |      | PV        | 1638 | All         | All           | First event   | Time-dependent | $\geq 15.0 \times 10^9/L$ | 1,71 | 1,1        | 2,65      | Multivariable |
|                          |      | PV        | 1638 | All         | Arterious     | First event   | Time-dependent | $\geq 15.0 \times 10^9/L$ | 1,67 | 0,99       | 3,8       | Multivariable |
|                          |      | PV        | 1638 | All         | Venous        | First event   | Time-dependent | $\geq 15.0 \times 10^9/L$ | 1,81 | 0,84       | 3,89      | Multivariable |
| Lim                      | 2015 | PV+ET     | 102  | All         | All           | First event   | Diagnosis      | $\geq 11.0 \times 10^9/L$ | 3,61 | 1,43       | 9,09      | Univariate    |
| Montanaro                | 2014 | ET        | 1144 | All         | All           | First event   | Diagnosis      | $\geq 15.0 \times 10^9/L$ | 1,42 | 0,61       | 3,29      | Univariate    |
| Ohyashiki                | 2008 | ET        | 54   | All         | All           | First event   | Diagnosis      | $\geq 12.0 \times 10^9/L$ | 5,95 | 1,49       | 23,70     | Univariate    |
| Palandri                 | 2011 | ET        | 532  | All         | All           | First event   | Diagnosis      | $\geq 11.0 \times 10^9/L$ | 1,76 | 1,05       | 2,97      | Multivariable |
| Passamonti               | 2010 | PV        | 338  | All         | All           | First event   | Diagnosis      | $\geq 11.0 \times 10^9/L$ | 1,1  | 0,4        | 3,4       | Multivariable |
| Passamonti               | 2009 | ET        | 359  | Low-risk    | All           | Recurrence    | Diagnosis      | Positive delta            | 3,86 | 1,4        | 10,5      | Univariate    |
| Patriarca                | 2010 | ET        | 106  | All         | All           | First event   | Diagnosis      | $\geq 8.4 \times 10^9/L$  | 2,8  | 1,08       | 7,03      | Multivariable |
| Piccin                   | 2015 | ET        | 136  | Low-risk    | All           | Recurrence    | Diagnosis      | Continuous                | 1,08 | 1,02       | 1,15      | Multivariable |
| Posfai                   | 2014 | PV+ET     | 128  | All         | All           | First event   | Diagnosis      | $\geq 11.1 \times 10^9/L$ | 1,41 | 0,36       | 5,51      | Multivariable |
| Wolanskyj                | 2006 | ET        | 322  | All         | All           | First event   | Diagnosis      | $\geq 15.0 \times 10^9/L$ | 1,74 | 1,15       | 2,66      | Multivariable |
| Zhao                     | 2016 | ET        | 71   | All         | All           | First event   | Diagnosis      | $\geq 10.0 \times 10^9/L$ | 0,73 | 0,19       | 2,75      | Multivariable |
| <b>OUTCOME: BLEEDING</b> |      |           |      |             |               |               |                |                           |      |            |           |               |
| Alvarez-Larran           | 2010 | ET        | 300  | Low-risk    | Bleeding      | First event   | Diagnosis      | $\geq 8.7 \times 10^9/L$  | 3,8  | 0,8        | 17,8      | Multivariable |

| First Author                                                            | Year | Diagnosis   | N    | Risk groups | Type of event | Time of event | WBC time  | Cut-off                   | RR   | 95% Low CI | 95% Up CI | Model         |
|-------------------------------------------------------------------------|------|-------------|------|-------------|---------------|---------------|-----------|---------------------------|------|------------|-----------|---------------|
| Alvarez-Larran                                                          | 2012 | PV          | 261  | Under HU    | Bleeding      | First event   | Diagnosis | $\geq 10.0 \times 10^9/L$ | 1,36 | 0,61       | 2,75      | Univariate    |
| Chou                                                                    | 2012 | ET+PV       | 247  | All         | Bleeding      | First event   | Diagnosis | $\geq 16 \times 10^9/L$   | 3,19 | 1,62       | 6,25      | Univariate    |
| Finazzi                                                                 | 2011 | ET+earlyPMF | 1104 | All         | Bleeding      | First event   | Diagnosis | $\geq 10.0 \times 10^9/L$ | 1,74 | 1,02       | 2,97      | Multivariable |
| <b>OUTCOME: HEMATOLOGICAL TRANSFORMATIONS IN MF/AML OR SOLID TUMORS</b> |      |             |      |             |               |               |           |                           |      |            |           |               |
| Bai                                                                     | 2008 | PV          | 320  | All         | MMM           | First event   | Diagnosis | Continuous                | 1,05 | 1,02       | 1,08      | Univariate    |
| Passamonti                                                              | 2010 | PV          | 338  | All         | MF            | First event   | Diagnosis | $\geq 11.0 \times 10^9/L$ | 0,3  | 0,6        | 1,1       | Multivariable |
|                                                                         |      | PV          | 338  | All         | AML           | First event   | Diagnosis | $\geq 11.0 \times 10^9/L$ | 1,6  | 0,3        | 9,3       | Multivariable |
| <b>OUTCOME: DEATH</b>                                                   |      |             |      |             |               |               |           |                           |      |            |           |               |
| Alvarez-Larran                                                          | 2012 | PV          | 261  | Under HU    | Death         | -             | Diagnosis | $\geq 10.0 \times 10^9/L$ | 2,9  | 1,5        | 5,9       | Multivariable |
| Barbui                                                                  | 2013 | mPV         | 140  | All         | Death         | -             | Diagnosis | $\geq 15.0 \times 10^9/L$ | 3,96 | 1,01       | 15,9      | Univariate    |
| Barraco                                                                 | 2017 | PV          | 267  | All         | Death         | -             | Diagnosis | $\geq 15.0 \times 10^9/L$ | 3,04 | 1,4        | 6,62      | Multivariable |
| Gangat                                                                  | 2007 | PV          | 459  | All         | Death         | -             | Diagnosis | $\geq 15.0 \times 10^9/L$ | 1,79 | 1,28       | 2,5       | Multivariable |
| Jeryczynski                                                             | 2017 | ET          | 225  | All         | Death         | -             | Diagnosis | $\geq 11.0 \times 10^9/L$ | 2,6  | 1,3        | 5,3       | Multivariable |
| Montanaro                                                               | 2014 | ET          | 1144 | All         | Death         | -             | Diagnosis | $\geq 15.0 \times 10^9/L$ | 2,11 | 1,05       | 4,25      | Multivariable |
| Mudireddi                                                               | 2017 | ET          | 183  | All         | Death         | -             | Diagnosis | $\geq 15.0 \times 10^9/L$ | 4,7  | 1,5        | 14,6      | Univariate    |
| Passamonti                                                              | 2010 | PV          | 338  | All         | Death         | -             | Diagnosis | $\geq 11.0 \times 10^9/L$ | 2,1  | 0,6        | 7,7       | Multivariable |
| Tefferi                                                                 | 2017 | ET          | 904  | All         | Death         | -             | Diagnosis | $\geq 11.0 \times 10^9/L$ | 1,5  | 1,2        | 1,9       | Multivariable |
|                                                                         |      | ET          | 590  | All         | Death         | -             | Diagnosis | $\geq 11.0 \times 10^9/L$ | 1,8  | 1,1        | 2,8       | Multivariable |
| Wolanskyj                                                               | 2006 | ET          | 322  | All         | Death         | -             | Diagnosis | $\geq 15.0 \times 10^9/L$ | 1,7  | 1,09       | 2,65      | Multivariable |

MF=myelofibrosis; AML=acute myeloid leukemia; MMM= myelofibrosis with myeloid metaplasia; HU=hydroxyurea; mPV=masked polycythemia vera

**Table S2. Newcastle - Ottawa quality assessment scale of publications included**

| Publication          | Selection | Comparability | Outcome | TOTAL SCORE | STUDY QUALITY |
|----------------------|-----------|---------------|---------|-------------|---------------|
| Abdulkarim, 2017     | 4         | 2             | 3       | 9           | GOOD          |
| Alvarez-Larran, 2010 | 3         | 1             | 2       | 6           | GOOD          |
| Alvarez-Larran, 2012 | 3         | 1             | 2       | 6           | GOOD          |
| Andriani, 2016       | 4         | 2             | 3       | 9           | GOOD          |
| Bai, 2008            | 2         | 0             | 2       | 4           | FAIR          |
| Barbui, 2014         | 3         | 2             | 3       | 8           | GOOD          |
| Barbui, 2015         | 4         | 2             | 3       | 9           | GOOD          |
| Barraco, 2017        | 4         | 2             | 3       | 9           | GOOD          |
| Buxhofer-Ausch, 2016 | 4         | 2             | 3       | 9           | GOOD          |
| Caramazza, 2009      | 3         | 1             | 2       | 6           | GOOD          |
| Carobbio, 2007       | 4         | 2             | 3       | 9           | GOOD          |
| Carobbio, 2008       | 3         | 2             | 3       | 8           | GOOD          |
| Carobbio, 2008       | 4         | 2             | 3       | 9           | GOOD          |
| Carobbio, 2009       | 3         | 2             | 3       | 8           | GOOD          |
| Carobbio, 2010       | 4         | 2             | 3       | 9           | GOOD          |
| Carobbio, 2011       | 4         | 2             | 3       | 9           | GOOD          |
| Cerquozzi, 2017      | 4         | 2             | 3       | 9           | GOOD          |
| Chou, 2012           | 3         | 1             | 2       | 6           | GOOD          |
| De Stefano, 2008     | 3         | 2             | 3       | 8           | GOOD          |
| De Stefano, 2010     | 3         | 2             | 3       | 8           | GOOD          |
| De Stefano, 2016     | 3         | 2             | 3       | 8           | GOOD          |
| Enblom-Larsson, 2017 | 3         | 0             | 1       | 4           | FAIR          |
| Finazzi, 2012        | 4         | 2             | 2       | 8           | GOOD          |
| Gangat, 2007         | 4         | 2             | 3       | 9           | GOOD          |
| Gangat, 2009         | 3         | 2             | 3       | 8           | GOOD          |
| Haider, 2016         | 4         | 2             | 3       | 9           | GOOD          |

| Publication       | Selection | Comparability | Outcome | TOTAL SCORE | STUDY QUALITY |
|-------------------|-----------|---------------|---------|-------------|---------------|
| Jeryczynski, 2017 | 3         | 2             | 2       | 7           | GOOD          |
| Kaifie, 2016      | 2         | 2             | 2       | 6           | GOOD          |
| Landolfi, 2007    | 4         | 2             | 3       | 9           | GOOD          |
| Montanaro, 2014   | 4         | 2             | 3       | 9           | GOOD          |
| Mudireddi, 2017   | 3         | 2             | 2       | 7           | GOOD          |
| Ohyashiki, 2008   | 3         | 0             | 1       | 4           | FAIR          |
| Palandri, 2011    | 4         | 2             | 2       | 8           | GOOD          |
| Passamonti, 2009  | 4         | 2             | 2       | 8           | GOOD          |
| Passamonti, 2010  | 4         | 2             | 2       | 8           | GOOD          |
| Patriarca, 2010   | 3         | 1             | 2       | 6           | GOOD          |
| Piccin, 2015      | 3         | 2             | 3       | 8           | GOOD          |
| Posfai, 2014      | 2         | 0             | 2       | 4           | FAIR          |
| Tefferi, 2017     | 4         | 2             | 3       | 9           | GOOD          |
| Wolanskyj, 2006   | 4         | 2             | 3       | 9           | GOOD          |
| Zhao, 2016        | 3         | 1             | 2       | 6           | GOOD          |

**Table S3. Meta-regression analysis with MPN diagnosis and type of thrombosis as moderators**

|                       | RR (95% CI)      | p-value |
|-----------------------|------------------|---------|
| <b>ET+PV</b>          | 1 (ref)          | -       |
| <b>ET only</b>        | 0.83 (0.60-1.15) | 0.251   |
| <b>PV only</b>        | 0.71 (0.50-0.99) | 0.043   |
| <b>All thrombosis</b> | 1 (ref)          | -       |
| <b>Arterial only</b>  | 0.89 (0.64-1.23) | 0.465   |
| <b>Venous only</b>    | 0.68 (0.47-0.99) | 0.046   |

Figure S1. Funnel plot of the primary outcome (thrombosis)

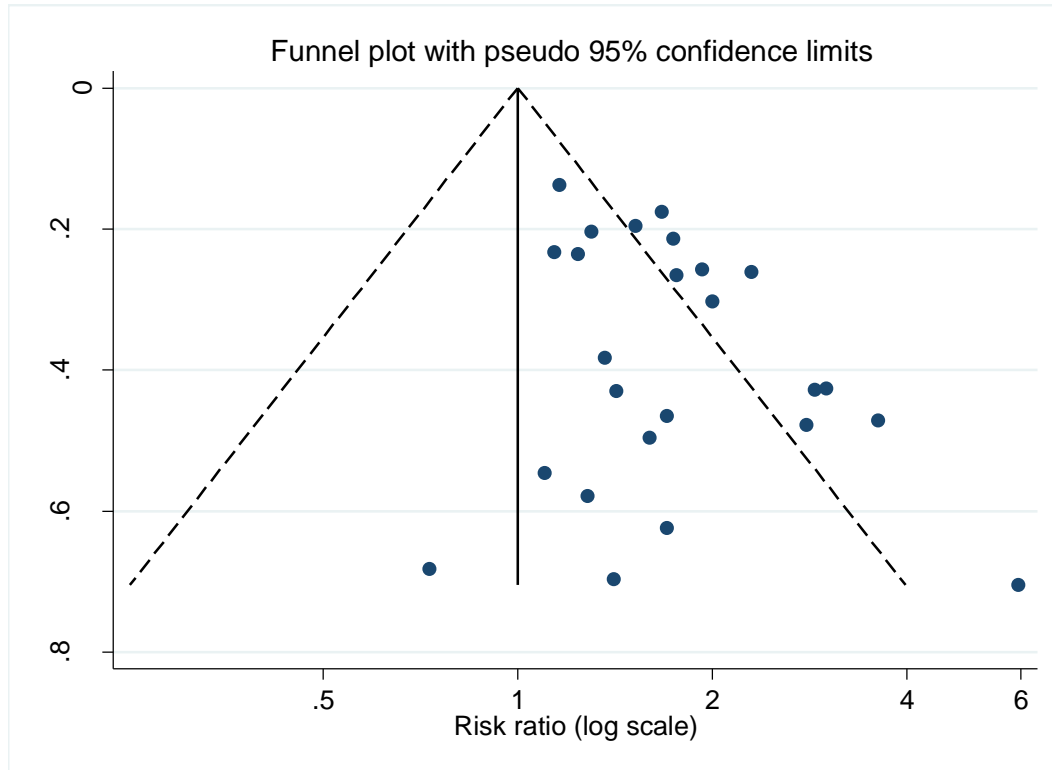

**Figure S2. Forrest plot for the primary outcome according to Duval and Tweedie's trim and fill procedure.** Four studies were added (fill 1 to 4), raising a concern that these left-hand studies may actually exist, and are missing from the original analysis. Duval and Tweedie's procedure finally re-compute the combined effect, with the diamond representing the adjusted RR.

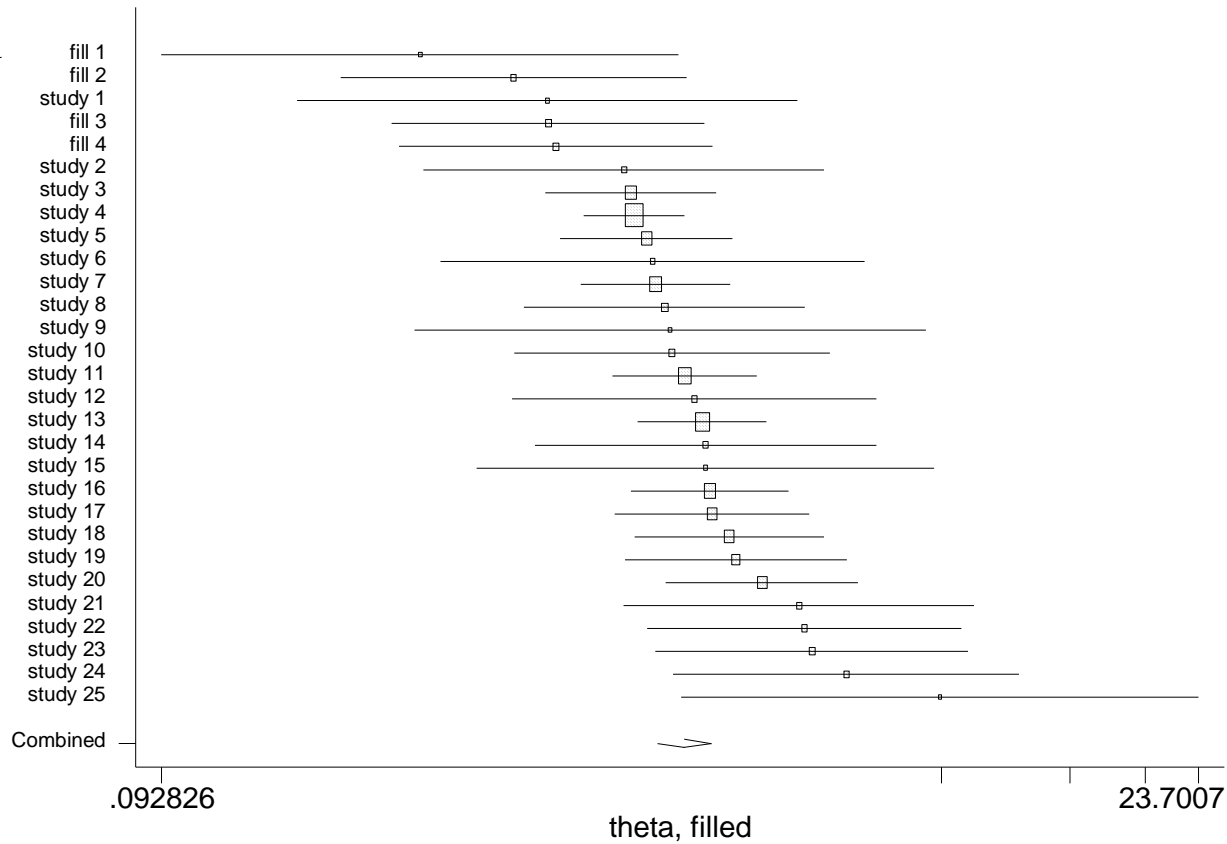



**Figure S3. Funnel plot of the primary outcome.** Circles are study actually included in the meta-analysis whereas squares represents studies potentially missing from the analysis according to Duval and Tweedie's procedure

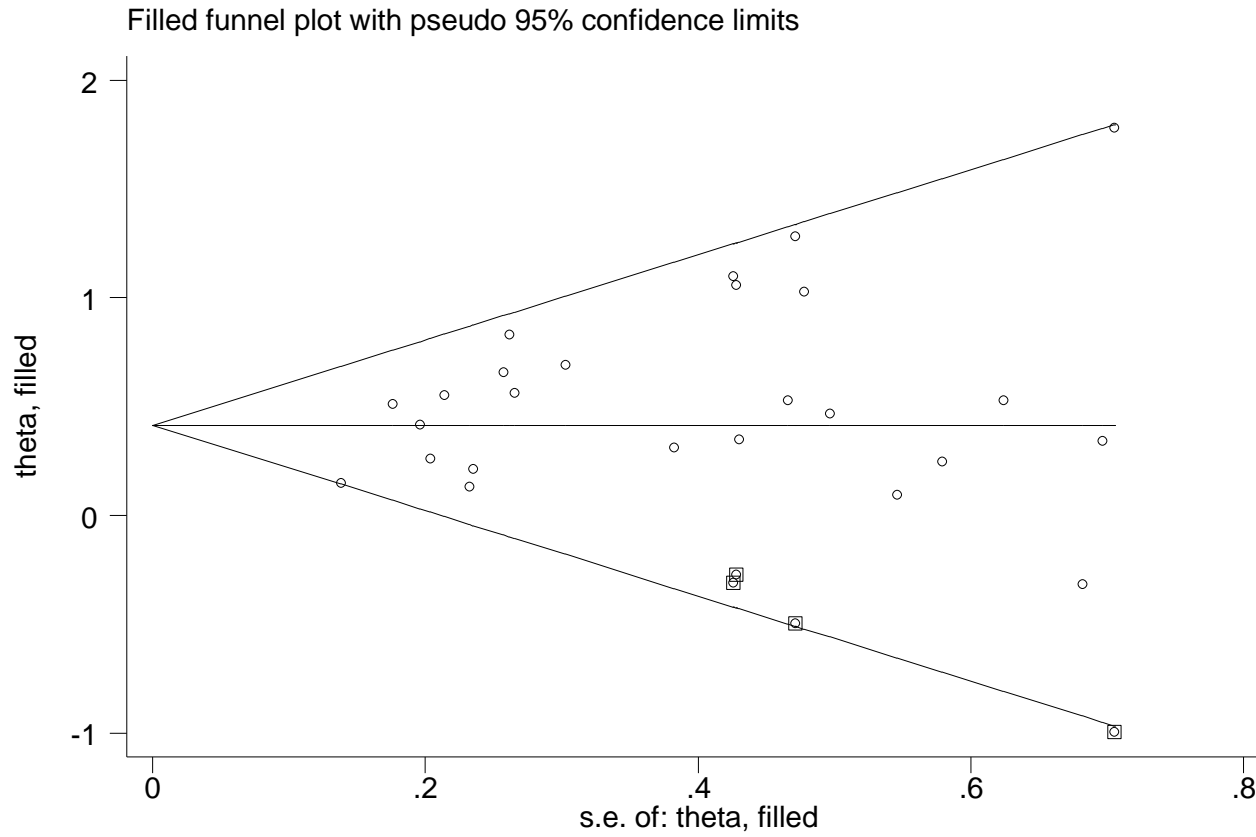

Supplement: baADV2019000211-suppl1.pdf [file baADV2019000211-suppl1.pdf]
